# Supplementary material for: Impact of kombucha, coffee, and turmeric beverages on the color stability of a single-shade versus a multi-shade resin-based composite
Source: PeerJ. 2025 Jul 23;13:e19759. doi: 10.7717/peerj.19759 (PMC12296578; doi:10.7717/peerj.19759)
Supplement: Supplemental Information 1 [file peerj-13-19759-s001.xlsx]

## Sheet: Sheet1
				Delta E statistical analysis
				Tests of Normality
						Material V			Material T
						Shapiro-Wilk			Shapiro-Wilk
						Statistic	df	Sig.	Statistic	df	Sig.
				Coffee	T1	0.94185	10	0.573776	0.863286	10	0.0834172
					T2	0.9604	10	0.790421	0.906604	10	0.258471
					T3	0.9689	10	0.880467	0.863691	10	0.0843374
				Kambucha	T1	0.949672	10	0.66462	0.946592	10	0.628394
					T2	0.913554	10	0.306307	0.962215	10	0.810807
					T3	0.973253	10	0.919255	0.909036	10	0.274435
				Turmeric	T1	0.846422	10	0.052658	0.962277	10	0.811492
					T2	0.717655	10	0.00144243	0.847123	10	0.0536815
					T3	0.977144	10	0.948075	0.959456	10	0.779648
				Only one variable is slightly deviated from normality . Parametric tests are applied
			Delta E Descriptive statistics
						N	Mean	SD	SEM	95% Confidence Interval for Mean		Minimum	Maximum
										Lower Bound	Upper Bound
			T1	Material V	Coffee	10	5.7839	1.53991	0.486963	4.68231	6.88549	3.14	7.719
					Kambucha	10	3.8673	1.41043	0.446016	2.85834	4.87626	1.706	5.743
					Turmeric	10	44.7754	2.28523	0.722654	43.1406	46.4102	42.471	49.381
				Material T	Coffee	10	6.0267	2.56955	0.812565	4.18855	7.86485	3.284	10.765
					Kambucha	10	6.2996	1.72495	0.545478	5.06564	7.53356	4.192	9.586
					Turmeric	10	33.3526	7.5668	2.39283	27.9396	38.7656	20.158	43.893
			T2	Material V	Coffee	10	10.3328	2.64767	0.837267	8.43877	12.2268	6.457	14.454
					Kambucha	10	7.8847	3.16877	1.00205	5.6179	10.1515	3.983	13.349
					Turmeric	10	46.824	4.23434	1.33902	43.7949	49.8531	37.187	50.078
				Material T	Coffee	10	9.4116	4.58405	1.4496	6.13237	12.6908	4.219	18.507
					Kambucha	10	8.0194	2.95942	0.935852	5.90236	10.1364	3.348	12.918
					Turmeric	10	42.5175	6.74558	2.13314	37.692	47.343	29.94	50.535
			T3	Material V	Coffee	10	11.8025	2.60235	0.822937	9.94089	13.6641	7	15.291
					Kambucha	10	8.7463	3.33463	1.0545	6.36085	11.1318	3.474	14.166
					Turmeric	10	50.3205	1.29907	0.410802	49.3912	51.2498	48.2	52.232
				Material T	Coffee	10	10.3649	5.03189	1.59122	6.7653	13.9645	4.978	19.431
					Kambucha	10	9.7736	4.68994	1.48309	6.41862	13.1286	3.612	17.463
					Turmeric	10	45.1952	1.82486	0.577071	43.8898	46.5006	41.446	48.01
						T1	T2	T3
				Material V	Coffee	5.7839	10.3328	11.8025
					Kambucha	3.8673	7.8847	8.7463
					Turmeric	44.7754	46.824	50.3205
						T1	T2	T3
				Material T	Coffee	6.0267	9.4116	10.3649
					Kambucha	6.2996	8.0194	9.7736
					Turmeric	33.3526	42.5175	45.1952
						T1	T2	T3
				Coffee
					T1	T2	T3
				Material V	5.7839	10.3328	11.8025
				Material T	6.0267	9.4116	10.3649
				Kambucha
					T1	T2	T3
				Material V	3.8673	7.8847	8.7463
				Material T	6.2996	8.0194	9.7736
				Turmeric
					T1	T2	T3
				Material V	44.7754	46.824	50.3205
				Material T	33.3526	42.5175	45.1952
			Color stability analysis Delta E
			General Linear Model
			Repeated measure mixed Design ANOVA
			Dependent variable : Delta E
			One within subjects factor : Time
			Two between subjects factors : Material and Solution
				Within-Subjects Factors
				Measure: DeltaE
				Time	Dependent Variable
				1	T1
				2	T2
				3	T3
				Between-Subjects Factors
						Value Label	N
				material	1.00	Material V	30
					2.00	Material T	30
				solution	1.00	Coffee	20
					2.00	Kambucha	20
					3.00	Turmeric	20
				Descriptive Statistics
					material	Solution	Mean	SD	N
				T1	Material V	Coffee	5.7839	1.53991	10
						Kambucha	3.8673	1.41043	10
						Turmeric	44.7754	2.28523	10
						Total	18.1422	19.2484	30
					Material T	Coffee	6.0267	2.56955	10
						Kambucha	6.2996	1.72495	10
						Turmeric	33.3526	7.5668	10
						Total	15.2263	13.8094	30
					Total	Coffee	5.9053	2.06551	20
						Kambucha	5.08345	1.97702	20
						Turmeric	39.064	7.99576	20
						Total	16.6843	16.6735	60
				T2	Material V	Coffee	10.3328	2.64767	10
						Kambucha	7.8847	3.16877	10
						Turmeric	46.824	4.23434	10
						Total	21.6805	18.4089	30
					Material T	Coffee	9.4116	4.58405	10
						Kambucha	8.0194	2.95942	10
						Turmeric	42.5175	6.74558	10
						Total	19.9828	16.9221	30
					Total	Coffee	9.8722	3.67392	20
						Kambucha	7.95205	2.98491	20
						Turmeric	44.6707	5.90995	20
						Total	20.8317	17.5515	60
				T3	Material V	Coffee	11.8025	2.60235	10
						Kambucha	8.7463	3.33463	10
						Turmeric	50.3205	1.29907	10
						Total	23.6231	19.3998	30
					Material T	Coffee	10.3649	5.03189	10
						Kambucha	9.7736	4.68994	10
						Turmeric	45.1952	1.82486	10
						Total	21.7779	17.3037	30
					Total	Coffee	11.0837	3.96805	20
						Kambucha	9.25995	3.99549	20
						Turmeric	47.7578	3.04789	20
						Total	22.7005	18.2489	60
				Mauchly's Test of Sphericity is nonsignificant indicating
				no violation of sphericity assumption
				Tests of Within-Subjects Effects
				Measure: DeltaE
				Source		Type III Sum of Squares	df	Mean Square	F	P Value
				Time	Sphericity Assumed	1137.78	2	568.889	57.0221	1.25071e-17	P < 0.001 Highly Significant
				Time * material	Sphericity Assumed	13.2613	2	6.63064	0.664617	0.516562	P > 0.05 Non Significant
				Time * solution	Sphericity Assumed	115.232	4	28.8079	2.88754	0.0257494	P < 0.05 Significant
				Time * material * solution	Sphericity Assumed	159.182	4	39.7954	3.98886	0.00466611	P < 0.01 Highly Significant
				Error(Time)	Sphericity Assumed	1077.48	108	9.97664
				Tests of Between-Subjects Effects
				Measure: DeltaE Transformed Variable: Average
				Source	Type III Sum of Squares	df	Mean Square	F	P Value
				Intercept	72520.3	1	72520.3	3171.94	1.19722e-49	P < 0.001 Highly Significant
				material	208.578	1	208.578	9.12293	0.00385107	P < 0.01 Highly Significant
				solution	50872.4	2	25436.2	1112.55	1.30336e-44	P < 0.001 Highly Significant
				material * solution	545.273	2	272.636	11.9248	5.13717e-05	P < 0.001 Highly Significant
				Error	1234.61	54	22.8631
				Estimated Marginal Means
			1. time
				Estimates
				Measure:DeltaE
				time	Mean	Std. Error	95% Confidence Interval
							Lower Bound	Upper Bound
				T1	16.6843	0.460729	15.7605	17.608
				T2	20.8317	0.553412	19.7221	21.9412
				T3	22.7005	0.441667	21.815	23.586
				Multiple Comparison by Bonferroni method
				(I) time	(J) time	Mean Difference (I-J)	Std. Error	P Value	95% Confidence Interval for Difference
									Lower Bound	Upper Bound
				T1	T2	-4.147	0.645331	1.05061e-07	-5.74193	-2.5529	P < 0.001 Highly Significant
				T1	T3	-6.016	0.589396	9.86734e-14	-7.47256	-4.55994	P < 0.001 Highly Significant
				T2	T3	-1.869	0.483553	0.000901169	-3.06362	-0.674048	P < 0.001 Highly Significant
				2. material
				Estimates
				Measure:DeltaE
				material	Mean	Std. Error	95% Confidence Interval
							Lower Bound	Upper Bound
				Material V	21.1486	0.504018	20.1381	22.1591
				Material T	18.9957	0.504018	17.9852	20.0062
				Pair wise Comparison by Bonferroni method
						Mean Difference	Std. Error	P Value	95% Confidence Interval for Difference
									Lower Bound	Upper Bound
				Material V	Material T	2.153	0.712789	0.00385107	0.723866	3.58198	P < 0.01 Highly Significant
				3. solution
				Estimates
				Measure:DeltaE
				solution	Mean	Std. Error	95% Confidence Interval
							Lower Bound	Upper Bound
				Coffee	8.95373	0.617294	7.71613	10.1913
				Kambucha	7.43182	0.617294	6.19422	8.66942
				Turmeric	43.8309	0.617294	42.5933	45.0685
				Multiple Comparison by Bonferroni method
				(I) time	(J) time	Mean Difference (I-J)	Std. Error	P Value	95% Confidence Interval for Difference
									Lower Bound	Upper Bound
				Cofee	Kambucha	1.52192	0.872985	0.260893	-0.635096	3.67893	P > 0.05 NS
				Cofee	Turmeric	-34.877	0.872985	2.62701e-41	-37.0341	-32.7201	P < 0.001 Highly Significant
				Kambucha	Turmeric	-36.399	0.872985	2.80996e-42	-38.5561	-34.242	P < 0.001 Highly Significant
				Conclusion
				1-The results of mixed model repeated measure ANOVA showed that Time has highly statistically significant effect on Delta E,
				2- Material and solutions have also statistically highly significant effect on Delta E .
				3-Two way Interactions ( Time *material ) is statistically nonsignificant, but (Time *Solution)
				is statistically significant while interaction of (material *Solution) is statistically highly significant.
				4-Three way interaction (Time*material *Solution) is also statistically highly significant .
				5-Pairwise Multipe comparison of Time showed that all time points are highly statistically significantly different from each other
				6-Pairwise comparison of material showed that there is statistically significant difference between the two materials.
				7-Pairwise Multipe comparison of solutions showed that Turmeric is statistically highly significantly different from
				coffee and Kambucha but (coffee & Kambucha ) are not statistically significantly different from each other.
