# Supplementary material for: Impact of kombucha, coffee, and turmeric beverages on the color stability of a single-shade versus a multi-shade resin-based composite
Source: PeerJ. 2025 Jul 23;13:e19759. doi: 10.7717/peerj.19759 (PMC12296578; doi:10.7717/peerj.19759)
Supplement: Supplemental Information 2 [file peerj-13-19759-s002.xlsx]

## Sheet: Sheet1
				Delta E statistical analysis
				Tests of Normality
						Material V			Material T
						Shapiro-Wilk			Shapiro-Wilk
						Statistic	df	Sig.	Statistic	df	Sig.
				Coffee	T1	0.941741	10	0.572549	0.866575	10	0.0911668
					T2	0.970123	10	0.891982	0.899665	10	0.217249
					T3	0.970871	10	0.898805	0.867992	10	0.0947135
				Kambucha	T1	0.95078	10	0.677737	0.965493	10	0.846203
					T2	0.945881	10	0.620098	0.958848	10	0.772665
					T3	0.980026	10	0.965307	0.913979	10	0.309459
				Turmeric	T1	0.888992	10	0.165198	0.890158	10	0.170271
					T2	0.702377	10	0.000941329	0.877137	10	0.120957
					T3	0.959131	10	0.775924	0.861121	10	0.0786669
				Only one variable is slightly deviated from normality . Parametric tests are applied
			Delta E Descriptive statistics
						N	Mean	SD	SEM	95% Confidence Interval for Mean		Minimum	Maximum
										Lower Bound	Upper Bound
			T1	Material V	Coffee	10	5.313	1.37601	0.435132	4.32866	6.29734	2.99	7.05
					Kambucha	10	3.424	1.15742	0.366009	2.59603	4.25197	1.57	4.93
					Turmeric	10	22.252	0.542685	0.171612	21.8638	22.6402	21.6	23.24
				Material T	Coffee	10	5.148	2.14333	0.677782	3.61475	6.68125	2.78	8.87
					Kambucha	10	4.878	1.05456	0.333483	4.12361	5.63239	3.46	6.71
					Turmeric	10	16.82	2.50707	0.792807	15.0265	18.6135	11.95	19.54
			T2	Material V	Coffee	10	9.153	2.23028	0.705277	7.55755	10.7484	5.91	12.73
					Kambucha	10	6.432	2.15488	0.681434	4.89049	7.97351	3.59	10.17
					Turmeric	10	22.956	1.16366	0.367983	22.1236	23.7884	20.43	23.9
				Material T	Coffee	10	7.853	3.75992	1.18899	5.16332	10.5427	3.53	15.46
					Kambucha	10	5.939	1.85558	0.586787	4.6116	7.2664	2.77	8.94
					Turmeric	10	19.691	2.13789	0.67606	18.1616	21.2204	15.97	21.93
			T3	Material V	Coffee	10	10.216	2.24515	0.709978	8.60992	11.8221	6.31	13.39
					Kambucha	10	7.114	2.41334	0.763166	5.3876	8.8404	3.18	11.13
					Turmeric	10	23.913	0.404366	0.127872	23.6237	24.2023	23.16	24.48
				Material T	Coffee	10	8.501	4.07239	1.2878	5.58779	11.4142	4.11	16.31
					Kambucha	10	7.11	2.85584	0.903097	5.06705	9.15295	3.08	11.74
					Turmeric	10	20.516	0.655137	0.207172	20.0473	20.9847	19.85	22.02
			Color stability analysis Delta E
			General Linear Model
			Repeated measure mixed Design ANOVA
			Dependent variable : Delta E
			One within subjects factor : Time
			Two between subjects factors : Material and Solution
				Within-Subjects Factors
				Measure: DeltaE
				Time	Dependent Variable
				1	T1
				2	T2
				3	T3
				Between-Subjects Factors
						Value Label	N
				material	1.00	Material V	30
					2.00	Material T	30
				solution	1.00	Coffee	20
					2.00	Kambucha	20
					3.00	Turmeric	20
				Descriptive Statistics
					material	Solution	Mean	SD	N
				T1	Material V	Coffee	5.313	1.37601	10
						Kambucha	3.424	1.15742	10
						Turmeric	22.252	0.542685	10
						Total	10.3297	8.67362	30
					Material T	Coffee	5.148	2.14333	10
						Kambucha	4.878	1.05456	10
						Turmeric	16.82	2.50707	10
						Total	8.94867	5.98174	30
					Total	Coffee	5.2305	1.75502	20
						Kambucha	4.151	1.31061	20
						Turmeric	19.536	3.29874	20
						Total	9.63917	7.41961	60
				T2	Material V	Coffee	9.153	2.23028	10
						Kambucha	6.432	2.15488	10
						Turmeric	22.956	1.16366	10
						Total	12.847	7.58548	30
					Material T	Coffee	7.853	3.75992	10
						Kambucha	5.939	1.85558	10
						Turmeric	19.691	2.13789	10
						Total	11.161	6.7187	30
					Total	Coffee	8.503	3.08178	20
						Kambucha	6.1855	1.97345	20
						Turmeric	21.3235	2.36891	20
						Total	12.004	7.15491	60
				T3	Material V	Coffee	10.216	2.24515	10
						Kambucha	7.114	2.41334	10
						Turmeric	23.913	0.404366	10
						Total	13.7477	7.65051	30
					Material T	Coffee	8.501	4.07239	10
						Kambucha	7.11	2.85584	10
						Turmeric	20.516	0.655137	10
						Total	12.0423	6.72936	30
					Total	Coffee	9.3585	3.31926	20
						Kambucha	7.112	2.57335	20
						Turmeric	22.2145	1.8214	20
						Total	12.895	7.19492	60
				Mauchly's Test of Sphericity is significant indicating violation of
				sphericity assumption Greenhouse-Geisser correction is applied
				Tests of Within-Subjects Effects
				Measure: DeltaE
				Source		Type III Sum of Squares	df	Mean Square	F	P Value
				Time	Greenhouse-Geisser	339.735	1.66821	203.653	69.9457	2.88428e-17	P < 0.001 Highly Significant
				Time * material	Greenhouse-Geisser	0.992954	1.66821	0.595223	0.204432	0.775443	P > 0.05 Non Significant
				Time * solution	Greenhouse-Geisser	16.3315	3.33641	4.89494	1.68119	0.171368	P > 0.05 Non Significant
				Time * material * solution	Greenhouse-Geisser	30.4623	3.33641	9.13027	3.13584	0.0249621	P < 0.05 Significant
				Error(Time)	Greenhouse-Geisser	1077.48	108	9.97664
				Tests of Between-Subjects Effects
				Measure: DeltaE Transformed Variable: Average
				Source	Type III Sum of Squares	df	Mean Square	F	P Value
				Intercept	23857.7	1	23857.7	2570.11	3.16378e-47	P < 0.001 Highly Significant
				material	113.876	1	113.876	12.2675	0.000933781	P < 0.001 Highly Significant
				solution	8249.1	2	4124.55	444.324	2.93223e-34	P < 0.001 Highly Significant
				material * solution	148.279	2	74.1397	7.98681	0.000914962	P < 0.001 Highly Significant
				Error	501.269	54	9.28276
				Estimated Marginal Means
			1. time
				Estimates
				Measure:DeltaE
				time	Mean	Std. Error	95% Confidence Interval
							Lower Bound	Upper Bound
				T1	9.63917	0.207625	9.2229	10.0554
				T2	12.004	0.303327	11.3959	12.6121
				T3	12.895	0.317096	12.2593	13.5307
				Multiple Comparison by Bonferroni method
				(I) time	(J) time	Mean Difference (I-J)	Std. Error	P Value	95% Confidence Interval for Difference
									Lower Bound	Upper Bound
				T1	T2	-2.365	0.304143	6.82487e-10	-3.11633	-1.61334	P < 0.001 Highly Significant
				T1	T3	-3.256	0.323727	1.67497e-13	-4.05571	-2.45595	P < 0.001 Highly Significant
				T2	T3	-0.891	0.213435	0.00032814	-1.41837	-0.363635	P < 0.001 Highly Significant
				2. material
				Estimates
				Measure:DeltaE
				material	Mean	Std. Error	95% Confidence Interval
							Lower Bound	Upper Bound
				Material V	12.3081	0.321157	11.6642	12.952
				Material T	10.7173	0.321157	10.0735	11.3612
				Pair wise Comparison by Bonferroni method
						Mean Difference	Std. Error	P Value	95% Confidence Interval for Difference
									Lower Bound	Upper Bound
				Material V	Material T	1.591	0.454184	0.000933781	0.680193	2.50136	P < 0.001 Highly Significant
				3. solution
				Estimates
				Measure:DeltaE
				solution	Mean	Std. Error	95% Confidence Interval
							Lower Bound	Upper Bound
				Coffee	7.69733	0.393335	6.90874	8.48592
				Kambucha	5.81617	0.393335	5.02758	6.60476
				Turmeric	21.0247	0.393335	20.2361	21.8133
				Multiple Comparison by Bonferroni method
				(I) time	(J) time	Mean Difference (I-J)	Std. Error	P Value	95% Confidence Interval for Difference
									Lower Bound	Upper Bound
				Cofee	Kambucha	1.881	0.55626	0.00403604	0.506733	3.2556	P < 0.01 Highly Significant
				Cofee	Turmeric	-13.327	0.55626	5.73993e-30	-14.7018	-11.9529	P < 0.001 Highly Significant
				Kambucha	Turmeric	-15.208	0.55626	7.8439e-33	-16.5829	-13.8341	P < 0.001 Highly Significant
				Conclusion
				1-The results of mixed model repeated measure ANOVA showed that Time has highly statistically significant effect on Delta E,
				2- Material and solutions have also statistically highly significant effect on Delta E .
				3-Two way Interactions ( Time *material ) is statistically nonsignificant, also (Time *Solution)
				is statistically non significant while interaction of (material *Solution) is statistically highly significant.
				4-Three way interaction (Time*material *Solution) is statistically significant .
				5-Pairwise Multipe comparison of Time showed that all time points are highly statistically significantly different from each other
				6-Pairwise comparison of material showed that there is statistically highly significant difference between the two materials.
				7-Pairwise Multipe comparison of solutions showed that all solutions are highly statistically significantly different from each other
