# Supplementary material for: Impact of kombucha, coffee, and turmeric beverages on the color stability of a single-shade versus a multi-shade resin-based composite
Source: PeerJ. 2025 Jul 23;13:e19759. doi: 10.7717/peerj.19759 (PMC12296578; doi:10.7717/peerj.19759)
Supplement: Supplemental Information 3 — Registered color values. [file peerj-13-19759-s003.xlsx]

## Sheet: Sheet2
	Specimen number	First reading (Baseline)			Second reading (After 6days)			First	Third reading (After 12 days )			Second	Fourth reading (After 18 days )			Third
		L	a	b	L	a	b	ΔE*1	L	a	b	ΔE*2	L	a	b	ΔE*3
Material V
Coffee	VC1	56.85	-2.87	0.6	55.88	-2.07	5.07	4.6435	53.38	-2.02	7.55	7.8145	52.81	-2.38	8.57	8.9489
	VC2	56.54	-2.87	0.28	53.25	-2.06	4.95	5.76967	50.52	-1.68	9.87	11.3853	51.5	-1.89	10.43	11.3747
	VC3	56.48	-3.04	0.89	54.26	-2.38	3.01	3.13981	53.26	-1.81	6.35	6.457	47.78	-1.55	11.76	14.0024
	VC4	56.67	-2.96	0.37	53.26	-1.69	6.6	7.21484	49.91	-1.27	11.1	12.794	50.41	-1.48	11.23	12.6221
	VC5	59.99	-2.61	0.67	53.43	-2.36	4.73	7.71879	50.06	-1.38	11.1	14.4535	50.74	-1.78	10.01	13.1714
	VC6	56.07	-3.36	1.07	54.11	-2.6	4.81	4.29031	50.96	-2.25	9.99	10.3398	52.14	-2.37	10.46	10.2273
	VC7	57.17	-3.04	0.65	53.35	-1.63	6.87	7.43431	50.87	-1.39	8.61	10.2847	48.09	-0.87	12.76	15.2908
	VC8	57.45	-2.74	0.09	54.07	-1.9	5.1	6.10165	53.69	-1.4	6.76	7.7732	54.61	-1.68	6.4	7.0004
	VC9	56.02	-3	0.29	53.45	-2.31	4.18	4.71308	50	-0.25	11.78	13.2598	49.96	-1.08	13.23	14.4171
	VC10	57.52	-2.94	0.39	53	-2.25	5.44	6.81242	51.7	-2.1	6.89	8.7652	51.87	-1.63	9.66	10.9705
Kambucha	VK1	59.16	-2.8	0.38	57.69	-2.8	5.86	5.67374	56.9	-2.87	6.6	6.6182	57.79	-1.56	10.65	10.4349
	VK2	56.4	-2.89	-0.12	55.62	-2.84	1.89	2.15662	56.64	-2.86	5.95	6.0748	55.69	-3.17	6.13	6.2964
	VK3	56.89	-2.73	-0.03	58.37	-2.9	3.71	4.02578	57.82	-2.86	5.49	5.5993	57.32	-3.48	4.43	4.543
	VK4	56.72	-3.07	0.23	56.5	-3.61	4.09	3.90379	57.32	-3.66	5.12	4.9619	55.01	-3.02	9.6	9.5249
	VK5	57.12	-3.06	0.32	58.45	-2.6	2.72	2.74483	55.19	-3.85	9.29	9.2092	55.55	-3.91	8.18	8.0602
	VK6	56.1	-3.28	1.06	57.7	-3.03	6.57	5.74305	55.41	-4.78	13.7	12.7474	55.44	-4.47	13.58	12.5937
	VK7	57.83	-3.12	0.64	57.67	-3.96	5.4	4.8362	55.18	-3.72	13.71	13.3494	53.05	-2.75	13.97	14.166
	VK8	56.05	-3.01	0.3	56.28	-3.02	1.99	1.70561	54.74	-4.32	9	8.8951	55.48	-4.31	9.13	8.9434
	VK9	57.29	-2.94	0.33	58.34	-3.72	4.89	4.74389	56.38	-3.57	7.66	7.4095	55.65	-3.59	9.59	9.4265
	VK10	57.9	-2.81	-0.33	56.87	-3.19	2.61	3.1383	57.38	-3.2	3.6	3.9834	56.41	-3.03	2.8	3.4735
Turmeric	VT1	56.8	-3.06	0.35	55.9	-9.04	43.74	43.8094	53.94	-7.7	48.11	48.07	55.45	-5.94	51.04	50.7897
	VT2	56.91	-3.11	0.04	56.21	-9.88	43.47	43.9601	55.08	-8.89	49.75	50.0784	55.66	-9.01	51.59	51.9016
	VT3	57.28	-2.82	-0.06	59.06	-11.6	42.91	43.8939	55.64	-9.02	36.57	37.1872	58.2	-8.88	50.07	50.5033
	VT4	56.35	-3.49	1.35	54.41	-9.21	50.36	49.3808	54.49	-7.6	50.57	49.4263	53.65	-5.02	51.38	50.1262
	VT5	57.04	-3.15	0.19	55.96	-10.23	47.74	48.0863	55.34	-5.57	47.73	47.6319	53.91	-3.56	51.43	51.3371
	VT6	56.27	-3.17	0.52	55.73	-11.93	42.41	42.7995	56.5	-10.54	40.97	41.1166	55.04	-8.92	48.36	48.2
	VT7	56.56	-2.92	0.11	57.69	-10.44	43.94	44.4848	53.85	-7.34	47.5	47.6728	54.41	-7.46	48.64	48.7893
	VT8	58.9	-2.78	0.44	58.63	-11.67	42.74	43.2249	55.34	-8.82	48.06	48.1334	55.73	-6.54	52.44	52.232
	VT9	57.49	-2.91	0.85	62.27	-9.13	42.59	42.4707	53.54	-5.11	50.17	49.5268	51.76	-5.38	50.15	49.6933
	VT10	57.17	-3.4	1.02	56.54	-12.61	45.72	45.6433	54.13	-4	50.32	49.3973	53.81	-4.78	50.52	49.6331
Material T
Coffee	TC1	57.54	-1.2	5.05	55.11	-0.55	8.59	4.3427	53.78	-0.56	10.51	6.6602	53.25	-0.49	10.77	7.1852
	TC2	59.87	-1.43	5.73	53.36	-0.96	10.69	8.1977	51.39	0.06	15.94	13.3557	50.66	0.34	17.36	14.9403
	TC3	59.47	-1.04	6.88	55.5	-1.59	9.176	4.619	54.04	-1.52	9.75	6.1605	53.69	-1.39	12	7.7295
	TC4	57.06	-1.09	4.84	53.52	-0.59	9.68	6.0172	53.44	-0.84	10.09	6.382	52.44	-0.67	11.41	8.0427
	TC5	57.52	-1.34	4.45	55.82	-1.1	7.25	3.2844	54.36	-0.81	8.52	5.1799	54.34	-0.83	9.01	5.5827
	TC6	57.57	-1.03	4.34	54.65	-1.3	6.97	3.9391	55.2	-0.99	7.83	4.2188	54.93	-0.95	8.56	4.9784
	TC7	57.26	-1.15	5.51	50.38	-0.58	13.77	10.7651	49.62	0.06	15.79	12.8652	48.77	0.39	17.45	14.7314
	TC8	57.95	-0.95	4.24	53.35	-1.26	6.32	5.0579	45.83	1.61	17.99	18.507	44.97	1.62	18.47	19.4314
	TC9	57.46	-1.09	5	55.31	-0.78	8.95	4.5079	49.06	0.13	13.4	11.9419	48.85	0.65	16.5	14.471
	TC10	59.95	-1.08	3.53	53.03	-0.56	10.07	9.5356	54.19	-0.34	10.2	8.8439	55.49	-0.83	8.33	6.557
Kambucha	TK1	59.54	-1.27	5.78	56.95	-2.05	10.8	5.7024	57.24	-1.9	14.17	8.7223	55.05	-0.94	18.64	13.6253
	TK2	58.72	-1.11	3.74	55.55	-1.51	7.16	4.6803	57.36	-1.45	6.78	3.3477	56.22	-0.69	8.31	5.226
	TK3	59.78	-1.09	2.94	55.62	-0.82	6.75	5.6475	57.93	-0.93	6.53	4.0418	58.7	-0.75	6.37	3.612
	TK4	57.71	-0.88	6.28	54.81	-1.22	15.41	9.5855	54.16	-1.41	17.23	11.5233	51.3	0.04	21.77	16.7891
	TK5	57.88	-1.16	4.54	54.64	-1.56	11.31	7.516	55.18	-1.6	11.71	7.6741	55.45	-1.28	12.62	8.4383
	TK6	57.84	-0.97	6.27	55.81	-0.9	13.07	7.0969	54.39	-0.96	14.69	9.0994	54.38	-0.76	14.34	8.783
	TK7	56.54	-1.11	5.16	54.17	-1.22	10.81	6.1279	53.23	-1.42	13.46	8.941	53.02	-1.34	13.68	9.2214
	TK8	57.89	-0.98	5.18	55.05	-1.9	12.55	7.9517	53.97	-1.66	17.47	12.9179	52.22	-0.03	21.67	17.4634
	TK9	59.36	-1.19	6.53	57.16	-1.46	10.44	4.4946	56.4	-1.59	12.64	6.801	55.82	-1.41	13.58	7.8919
	TK10	59.16	-1.08	3.4	56.3	-0.9	6.46	4.1923	54.54	-0.83	8.82	7.1262	54.55	-0.88	8.24	6.6871
Turmeric	TT1	59.64	-1.42	5.75	58.13	-10.36	42.26	37.6189	57.61	-8.81	37.41	32.5744	54.4	-2.95	49.29	43.8809
	TT2	57.42	-0.99	4.44	56.74	-10.16	32.93	29.9371	53.96	-3.95	50.22	46.0059	54.28	-5.24	50.62	46.4813
	TT3	60.09	-1.08	3	56.65	-8.05	36.03	33.9322	54.7	-5.7	48.51	46.0604	54.43	-5.69	49.53	47.0991
	TT4	59.3	-1.35	5.68	57.15	-4.8	35.45	30.0463	56.37	-4.87	43.28	37.8779	55.64	-5.61	53.36	48.0096
	TT5	59.4	-1.24	6.29	56.17	-3.61	50	43.8932	54.23	-4.41	56.46	50.5352	55.05	-3.59	50.95	44.9328
	TT6	60.27	-1.08	3.13	57.64	-7.23	39.49	36.9701	54.37	-4.49	49.32	46.69	54.22	-7.22	43.67	41.4463
	TT7	57.15	-1.17	4.89	56.18	-9.97	38.93	35.1725	56.09	-8.77	33.83	29.9401	54.65	-5.72	49.37	44.7819
	TT8	59.25	-1.27	6.02	57.63	-7.81	28.66	23.6213	54.68	-2.43	50.05	44.2817	54.94	-4.39	50.24	44.539
	TT9	59.22	-1.26	6.54	56.85	-7.73	48.15	42.1767	53.17	1.36	52.76	46.6878	52.64	2.67	51.63	45.7367
	TT10	59.07	-1.37	6.1	57.37	-6.9	25.41	20.1581	55.69	-7.77	50.03	44.5222	55.82	-9.47	50.29	45.0436
